# Supplementary material for: Interpersonal Psychotherapy to Reduce Psychological Distress in Perinatal Women: A Systematic Review
Source: MDPI journal article supplement (doi:10.3390/ijerph17228421), 2020-11-13
Supplement: s1 [file s1]

## Appendix A Medline Search Strategy

### Interpersonal Psychotherapy to Reduce Psychological Distress in Perinatal Women: A Systematic Review

Medline search strategy was adapted for the other databases. Keywords were constant across databases and subject headings were relevant to each specific database

Database(s): **Ovid MEDLINE(R) and Epub Ahead of Print, In-Process & Other Non-Indexed Citations and Daily Search Strategy:**

| #  | Searches                                                                                                                                               |
|----|--------------------------------------------------------------------------------------------------------------------------------------------------------|
| 1  | exp Prenatal Care/                                                                                                                                     |
| 2  | exp Postnatal Care/                                                                                                                                    |
| 3  | exp Postpartum Period/                                                                                                                                 |
| 4  | exp Peripartum Period/                                                                                                                                 |
| 5  | exp Pregnancy/                                                                                                                                         |
| 6  | (perinatal or prenatal or antenatal or peri-natal or pre-natal or ante-natal or postnatal or post-natal).tw,kf.                                        |
| 7  | (peripartum or peri-partum or intrapartum or intra-partum or antepartum or ante-partum or postpartum or post-partum or puerperium or puerperal).tw,kf. |
| 8  | pregnanc*.tw,kf.                                                                                                                                       |
| 9  | pregnant.tw,kf.                                                                                                                                        |
| 10 | or/1-9                                                                                                                                                 |
| 11 | ((interpersonal or inter-personal) adj2 (therap* or psychotherap* or psychotherap* or psycho-therap* or counsel*)).tw,kf.                              |
| 12 | ipt.tw,kf.                                                                                                                                             |
| 13 | ipt-g.tw,kf.                                                                                                                                           |
| 14 | or/11-13                                                                                                                                               |
| 15 | 10 and 14                                                                                                                                              |
